# Supplementary material for: Effects of Low ω6:ω3 Ratio in Sow Diet and Seaweed Supplement in Piglet Diet on Performance, Colostrum and Milk Fatty Acid Profiles, and Oxidative Status
Source: PubMed Central journal article supplement (PMC7694489; doi:10.3390/ani10112049), 2020-11-05
Supplement: animals-10-02049-s001.pdf [file animals-10-02049-s001.pdf]

**Table S1.** Growth performance of post-weaning piglets fed seaweed (SW)

| Sow diets (SD)              | CR                   |                     | LR                   |                      | SEM <sup>1</sup> | p-value |       |         |
|-----------------------------|----------------------|---------------------|----------------------|----------------------|------------------|---------|-------|---------|
| Piglet diets (PD)*          | CT                   | SW                  | CT                   | SW                   |                  | SD      | PD    | SD x PD |
| No. of piglets**            | 10                   | 10                  | 10                   | 10                   |                  |         |       |         |
| BW <sup>2</sup> (kg)        |                      |                     |                      |                      |                  |         |       |         |
| d 0                         | 6.19                 | 6.19                | 6.66                 | 6.36                 | 0.55             | 0.509   | 0.595 | 0.590   |
| d 7                         | 6.86                 | 7.21                | 7.58                 | 6.89                 | 0.59             | 0.712   | 0.565 | 0.087   |
| d 15                        | 9.56                 | 10.72               | 10.62                | 9.32                 | 0.98             | 0.852   | 0.886 | 0.018   |
| d 21                        | 12.41 <sup>b</sup>   | 14.14 <sup>a</sup>  | 13.64                | 12.13                | 1.17             | 0.713   | 0.850 | 0.010   |
| ADG <sup>2</sup> (g/d)      |                      |                     |                      |                      |                  |         |       |         |
| d 0 to 7                    | 51.86                | 101.30              | 157.50               | 100.20               | 62.74            | 0.106   | 0.901 | 0.099   |
| d 7 to 15                   | 346.85 <sup>b</sup>  | 447.64 <sup>a</sup> | 375.05 <sup>ab</sup> | 298.14 <sup>bc</sup> | 60.95            | 0.310   | 0.698 | 0.007   |
| d 15 to 21                  | 471.65               | 567.97              | 527.00               | 491.98               | 73.17            | 0.780   | 0.409 | 0.083   |
| d 0 to 15                   | 202.76               | 279.59              | 275.82               | 211.51               | 55.73            | 0.955   | 0.824 | 0.017   |
| d 0 to 21                   | 276.15 <sup>b</sup>  | 358.55 <sup>a</sup> | 345.63               | 289.71               | 52.20            | 0.993   | 0.616 | 0.013   |
| FP <sup>2</sup> (kg/period) |                      |                     |                      |                      |                  |         |       |         |
| d 0 to 7                    | 1.08                 | 1.36                | 1.56                 | 1.38                 | 0.31             | 0.123   | 0.757 | 0.152   |
| d 7 to 15                   | 3.87                 | 4.34                | 4.19                 | 3.47                 | 0.58             | 0.598   | 0.665 | 0.049   |
| d 15 to 21                  | 4.31 <sup>b</sup>    | 5.00 <sup>a</sup>   | 4.45 <sup>ab</sup>   | 3.53 <sup>c</sup>    | 0.48             | 0.127   | 0.644 | 0.002   |
| d 0 to 15                   | 5.18                 | 5.92                | 5.60                 | 4.70                 | 0.84             | 0.596   | 0.851 | 0.060   |
| d 0 to 21                   | 9.63 <sup>ab</sup>   | 11.07 <sup>a</sup>  | 9.96 <sup>a</sup>    | 8.13 <sup>b</sup>    | 1.17             | 0.234   | 0.743 | 0.009   |
| ADFI <sup>2</sup> (g/d)     |                      |                     |                      |                      |                  |         |       |         |
| d 0 to 7                    | 154.46               | 194.17              | 222.59               | 196.79               | 44.58            | 0.123   | 0.757 | 0.152   |
| d 7 to 15                   | 483.86               | 542.20              | 523.48               | 433.50               | 72.35            | 0.598   | 0.665 | 0.049   |
| d 15 to 21                  | 717.62               | 833.07              | 741.10               | 588.15               | 80.39            | 0.127   | 0.644 | 0.002   |
| d 0 to 15                   | 345.07               | 394.71              | 373.65               | 313.38               | 56.11            | 0.596   | 0.851 | 0.060   |
| d 0 to 21                   | 458.59 <sup>ab</sup> | 527.04 <sup>a</sup> | 474.17 <sup>a</sup>  | 387.27 <sup>b</sup>  | 55.81            | 0.234   | 0.743 | 0.009   |
| G : F <sup>3</sup>          |                      |                     |                      |                      |                  |         |       |         |
| d 0 to 7                    | 0.59                 | 0.48                | 0.70                 | 0.57                 | 0.27             | 0.377   | 0.198 | 0.960   |
| d 7 to 15                   | 0.65                 | 0.79                | 0.74                 | 0.72                 | 0.12             | 0.853   | 0.152 | 0.065   |
| d 15 to 21                  | 0.68                 | 0.71                | 0.68                 | 0.76                 | 0.09             | 0.509   | 0.085 | 0.426   |
| d 0 to 15                   | 0.55 <sup>b</sup>    | 0.75 <sup>a</sup>   | 0.71                 | 0.67                 | 0.16             | 0.561   | 0.125 | 0.033   |
| d 0 to 21                   | 0.62                 | 0.73                | 0.70                 | 0.70                 | 0.08             | 0.457   | 0.068 | 0.050   |

CR: sow diet with  $\omega_6:\omega_3$  ratio=13:1 during gestation, starting from day 28 (G28) and 10:1 during lactation; LR: sow diet with  $\omega_6:\omega_3$  ratio=4:1 from G28 until the end of lactation. CT: post-weaning piglets dietary supplemented without intact seaweed powder. SD: sow diets, PD: piglet diets. BW: body weight, ADG: average daily gain, ADFI: average daily feed intake, G:F: gain : feed ratio.

\* The trial was performed from weaning to d 21 of post-weaning with 4 g seaweed supplementation per kg of feed. Feed residual and daily feed intake of each piglet were recorded every morning, from day 0 (weaning) – 21 post-weaning to calculate average daily feed intake and feed conversion ratio. Individual body weight of piglets was measured on day 0, 7, 15 and 21 of post-weaning.

\*\* Piglets were kept in individual pens (0.47 m<sup>2</sup>) with *ad libitum* feed and water.

<sup>1</sup> SEM: Standard error of the means. Means are presented as least square means.

<sup>2</sup> have normal distribution so Mixed procedure was performed.

<sup>3</sup> do not have normal distribution so GENMOD procedure (GEE model) was performed.
